# Supplementary material for: PAY1 improves plant architecture and enhances grain yield in rice
Source: PubMed Central journal article supplement — Plant J. 2015 Jul 7;83(3):528–36. doi: 10.1111/tpj.12905 (PMC4758413; doi:10.1111/tpj.12905), 2015-07-07
Supplement: TPJ-83-528-s001.pdf [file TPJ-83-528-s001.pdf]

**Figure S1**

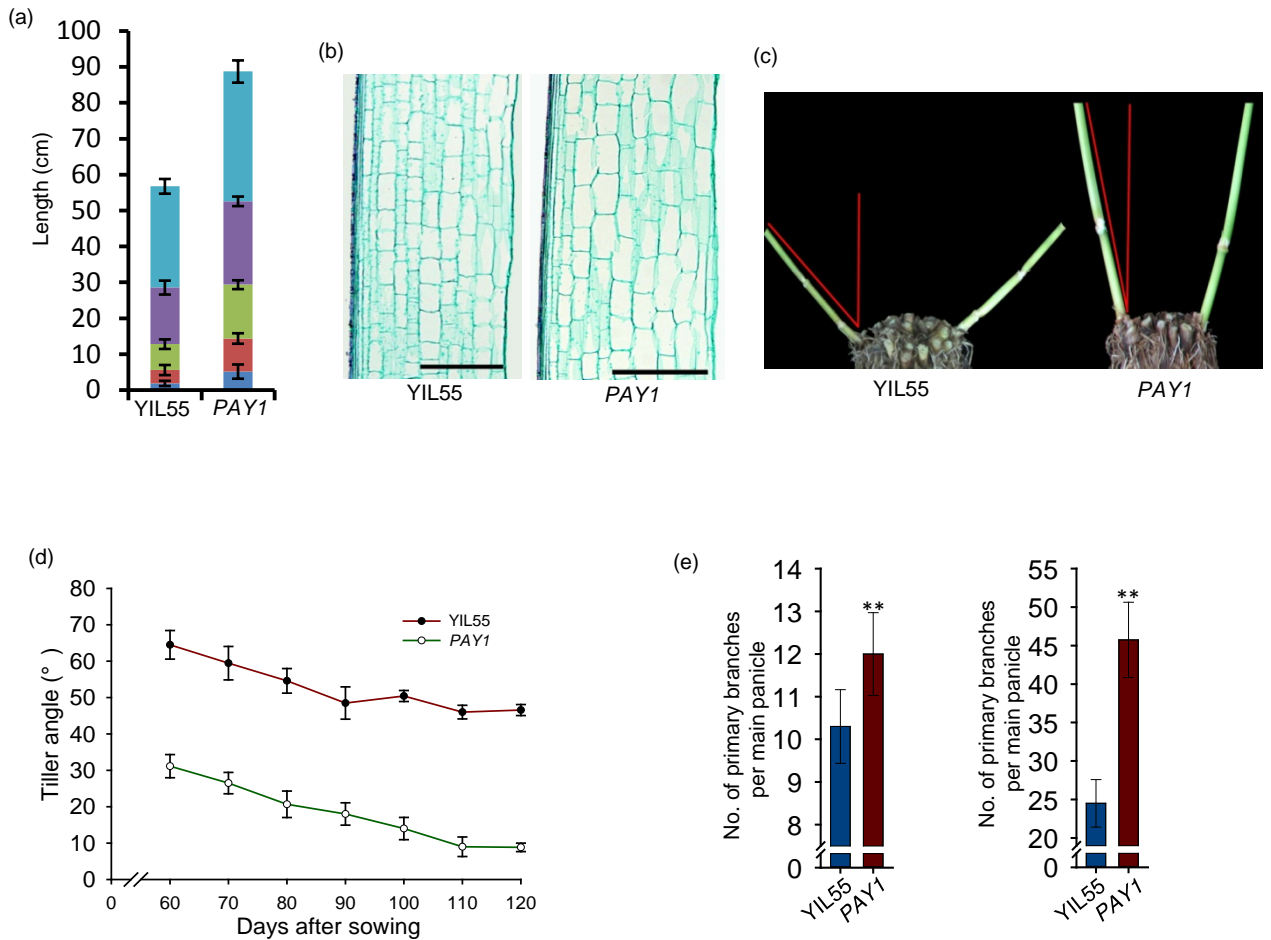

**Supplementary Fig. 1** Phenotype of wild-type (YIL55) and *PAY1* mutant. (a) Internode length comparison between YIL55 and *PAY1* mutant. I (light blue), II (purple), III (green), IV (red) and V (blue) indicate the first to fifth internodes, respectively. Data are means  $\pm$  s.d. ( $n = 15$ ). (b) Cross-sections of the corresponding parts of the fifth internode (V) between YIL55 and *PAY1* mutant (marked by white boxes in Figure 1c). Scale bars, 400  $\mu$ m. (c) The base of two primary tillers; the tiller angle is marked with red lines. (d) Changes in tiller angle during development in YIL55 and *PAY1* mutant. Data are means  $\pm$  s.d. ( $n = 10$ ). (e) Comparison of the number of primary branches and secondary branches per main panicle between YIL55 and *PAY1* mutant plants. Data are means  $\pm$  s.d. ( $n = 30$ ). The double asterisks represent a significant difference determined by Student's *t*-test at  $P < 0.01$ .
