# Supplementary material for: PAY1 improves plant architecture and enhances grain yield in rice
Source: PubMed Central journal article supplement — Plant J. 2015 Jul 7;83(3):528–36. doi: 10.1111/tpj.12905 (PMC4758413; doi:10.1111/tpj.12905), 2015-07-07
Supplement: TPJ-83-528-s002.pdf [file TPJ-83-528-s002.pdf]

**Figure S2**

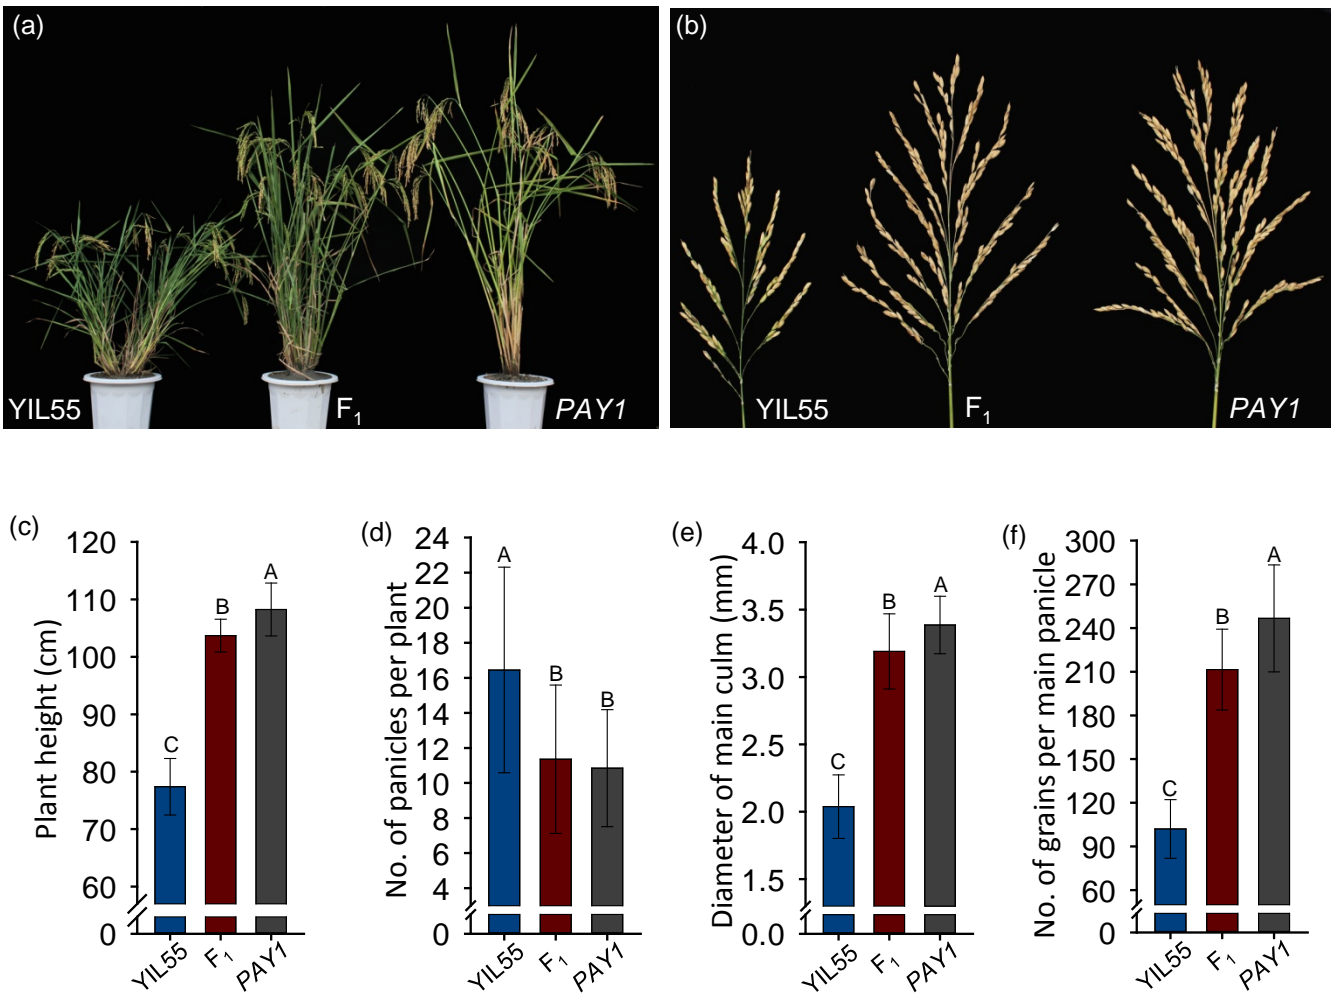

**Supplementary Fig. 2** Phenotypic characterization of F<sub>1</sub> plants derived from the cross of YIL55 with *PAY1* mutant. Comparison of gross morphologies (a), main panicles (b), plant height (c), tiller number (d), diameter of the fifth internode (e) and grain number of main panicle (f) among YIL55, F<sub>1</sub> plant and *PAY1* mutant plants at the maturity stage. Values are means  $\pm$  s.d. ( $n = 50$ ). Capital letters represent significant differences determined at  $P < 0.05$  from multiple comparisons.
