# Supplementary material for: PAY1 improves plant architecture and enhances grain yield in rice
Source: PubMed Central journal article supplement — Plant J. 2015 Jul 7;83(3):528–36. doi: 10.1111/tpj.12905 (PMC4758413; doi:10.1111/tpj.12905), 2015-07-07
Supplement: TPJ-83-528-s003.pdf [file TPJ-83-528-s003.pdf]

Figure S3

```
1 gattcatttggtcaagcttgtagcgagagatgacaactccggttgagcatgattttcagttagagttaccaa  
76 ttggcttaaaaagggagatggcaactctattagtgtgtaaagttactcaacagtgaggattttctaaagctcaac  
151 agaactagatgataacttgcataATGCCGCCCTCAGATATTTGGAAGGCCATGCAGGGTCACAGTCAGAGG  
M R P S D I W K A H A G S S Q S E G  
226 ATCAGCACTGGATATGGAGAGAAACGGATGCAACCATAACTGTTGCCCATCTCCTCTCCAACCAATGCATCAGG  
S A L D M E R N G C N H N C C P S P L Q P I A S G  
301 TGGTCAGCACTGAAAGCAGCGCTGCATATTTTCTTGGCCAACATCTACTCTAATGCACGGGTCTGCCGAAG  
G Q H S E S S A A Y F S W P T S T L M H G S A E G  
376 CCGCGCTAATTACTTTGGGAACCTACAGAAGGGTGTGTACCTGGACATCTTGGCCGCTTGCCAACAGGGCAAAG  
R A N Y F G N L Q K G V L P G H L G R L P T G Q R  
451 GGCCACCACCTTGTGATTTGATGATTATAAGAGCATTCACAGCAAGATCTACGTCGCTTTAGTCTTGGTAC  
A T T L L D L M I I R A F H S K I L R R F S L G T  
526 AGCAATAGGCTTTCGAATCAAGAAGGGTACATTGACTGTAATCTTCCATCCTTGTTTTTTGTGCTCGGAAGGT  
A I G F R I K K G T L T D T P A I L V F V A R K V  
601 GCACAGGAAGTGGCTCAGCACTACACAGTGCCTTCCGGCTCACCTTGAGGGACCGGGGGAGTGTGGTGTGATGT  
H R K W L S T T Q C L P A H L E G P G G V W C D D V  
676 CGATGTTGTTGAATCTTACTATGGGCACCAGCACTCAAAAGGAACATTTGTATGACGAGCTTGTGTA  
D V V E F S Y Y G A P A P T P K E Q L Y D E L V D  
751 TGGTCTGCGTGGTAGTGATCCATCTATCGGCTCTGGTTCACAGGTAGCTAGCCTTGAACATATGGTACATTGGG  
G L R G S D P S I A G S G S V A S L E T Y G T L G  
826 TGCCATTGTGAAGATCGAAGCTGGTAATGAAGCAAGTAGCCTTCCCTGACAAACAGGCATGTTGCCGTTGACCTGGGA  
A I V K S R T G N K Q V G F L T N R H V A V D L D  
901 TTACCCTAACAGAAGATGTTCCATCCCTTGCCTCCGAATCTTGGGCCCTGGTGTATACCTAGGTGCTGTTGAGCC  
Y P N Q K M F H P L P P N L G P G V Y L G A V E R  
976 AGCAACATCATTTATCACAGATGATGTTTGGTATGTTATCTATGCGGGAACAAATCCAGAGACATTTGTCAGAGC  
A T S F I T D D V W Y G I Y A G T N P E T F V R A  
1051 TGATGGTGCATTTATACCGTTTGTGATGATTATGACATAACTAGTGTAAATACCTCAGTCAAAGGAGTTGGAGT  
D G A F I P F A D D Y D I T S V N T S V K G V G V  
1126 CATAGGTGATGTAAGGCAATCGATCTACAATCCCCAATTAGCAGTCTCATCGGAAGACAGGTTGTCAAAGTTGG  
I G D V K A I D L Q S P I S S L I G R Q V V K V G  
1201 AAGAAGCTCTGGTTTGACGACAGGGACCGTTGTGGCATAACGCTTGAATACAATGATGAGAAGGGCATATGCTT  
R S S G L T T G T V V A A Y A L E Y N D E K G I C F  
1276 CTTACAGACTTTCTTGTGTTGGGGAGAACAACAATTGATCTTGAAGGGATAGTGAAGCCTTATAAT  
F T D F L V V G E N Q Q T F D L E G D S G S L I I  
1351 CTTAACAGGAAAAGATGGCGAAAAGCCACAGCCCATAGGGATTATATGGGGTGGCACAGCCAATCGGGGAGGTT  
A (PAY1)  
L T G K D G E K P Q P I G I I W G G T A N R G R L  
Q (PAY1)  
1426 GAAGCTCAAAGTGGCCAGGGTCTGAGAACTGGACAAGTGGGGTTGATCTCGGACGGCTTCTGGATCTATTGGA  
K L K S G Q G P E N W T S G V D L G R L L D L L E  
1501 GCTTGATCTAATCATAAGTGAAGGACTACAAGAGGCCCTAGAGGAACAACGAATATTCTAGCTGCTGCTGC  
L D L I T T S E G L Q E A L E E Q R I I L A A A A  
1576 AGCAGCACTAATCAACTGCTGGGAACTCCTCACCTGTTGCTGCTCAAGAAAATGAGAAAGTTGACAAGAT  
A A A N S T A G E S S P V A G P Q E N E K V D K I  
1651 TTACGAGCCTTGGAAATCAACATCCAACAGCTTCCAAGAGACAATTACAGCCACCTCCACAGGACCCGATGAGTT  
Y E P L G I N I Q Q L P R D N S A T S T G P D E F  
1726 CCATGTCGACACGGTGGAAAGCGTCACCAACGTCGAGGAGCGCCAATTCTCATTGGCATGTCTCCAGCACGGA  
H V D T V E G V T N V E E R Q F L I G M S P A R E  
1801 AGGCCAAGAAGCCAAATGGCGACTGAACAACCTTGCAGGACTAGAGAATTCACCTGAAGACATTTGCTTCTCCT  
G Q E A N G D L N N L A E L E N S P E D I C F S L  
1876 GCATCTGGGCGAGAGGGGCCAAGCGACTCCGCTCCGATTCGCTGGACATAGACTGCAGAAATGAaatga  
H L G E R E P K R L R S D S S L D I D L Q K *  
1951 agctgtgctgctgcttccatcaccacccagctctgtataacctagtgaagcagttccattctatgaacccaat  
2026 agaaataaatatgggctaggtatgtttccggaaactatctagataggtatccggataatttctatcgttttca  
2101 caggatacaagccttactgtatgtttctgttttaaaaaattttctgaattcgtttctgttttaggtacc
```

**Supplementary Fig. 3** Full-length cDNA of *pay1* from wild-type (YIL55) and the deduced amino acid sequence. For nucleotide sequence, the lowercase letters indicate 5'- and 3'-UTR, respectively, and the red, black, blue, green and purple uppercase letters indicate five different exons, respectively. The red letters refer to the nucleotide and amino acid changes in the *PAY1* mutant.
