# Supplementary material for: PAY1 improves plant architecture and enhances grain yield in rice
Source: PubMed Central journal article supplement — Plant J. 2015 Jul 7;83(3):528–36. doi: 10.1111/tpj.12905 (PMC4758413; doi:10.1111/tpj.12905), 2015-07-07
Supplement: TPJ-83-528-s004.pdf [file TPJ-83-528-s004.pdf]

**Figure S4**

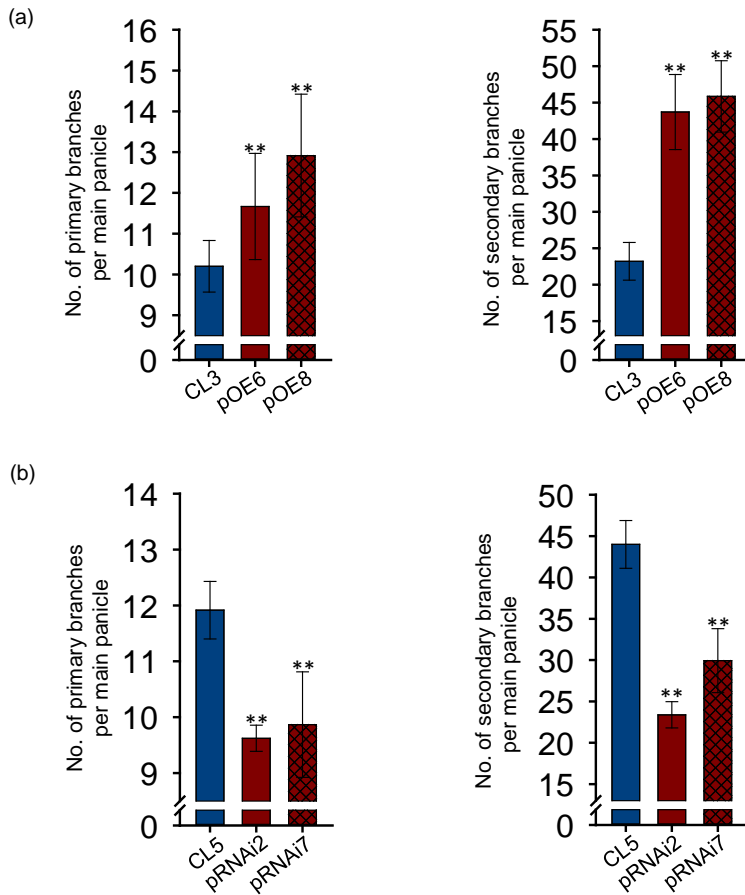

**Supplementary Fig. 4** Phenotype of control plant and transgenic plant. (a) Comparison of the number of primary branches and secondary branches per main panicle between control plant (CL3) and *PAY1*-overexpression transgenic plants (pOE6 and pOE8). Data are means  $\pm$  s.d. ( $n = 30$ ). (b) Comparison of the number of primary branches and secondary branches per main panicle between control (CL5) and RNAi transgenic plants (pRNAi2 and pRNAi7). Data are means  $\pm$  s.d. ( $n = 30$ ). The double asterisks represent a significant difference determined by Student's *t*-test at  $P < 0.01$ .
