# Supplementary material for: PAY1 improves plant architecture and enhances grain yield in rice
Source: PubMed Central journal article supplement — Plant J. 2015 Jul 7;83(3):528–36. doi: 10.1111/tpj.12905 (PMC4758413; doi:10.1111/tpj.12905), 2015-07-07
Supplement: TPJ-83-528-s005.pdf [file TPJ-83-528-s005.pdf]

**Figure S5**

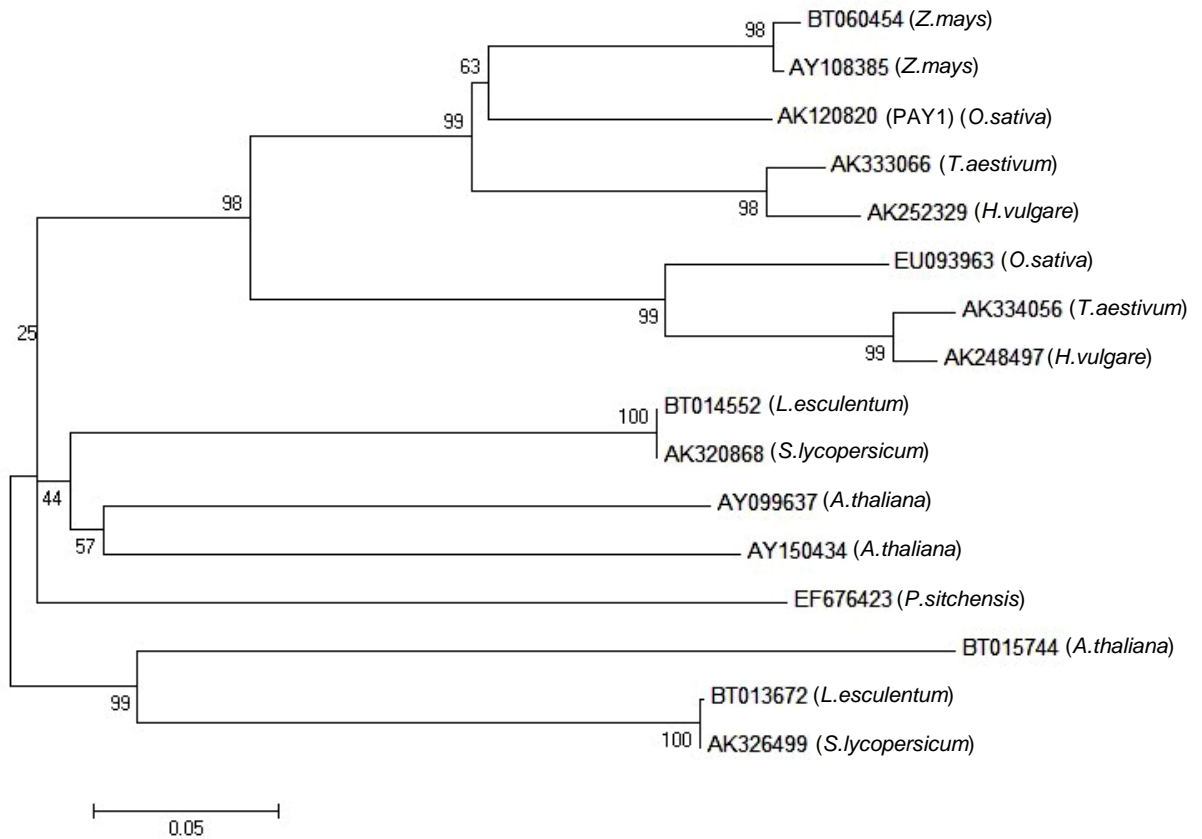

**Supplementary Fig. 5** Phylogeny of the PAY1 protein family. A neighbor-joining tree was built by MEGA5 using a Poisson correction model with gaps to complete deletion. Topological robustness was assessed by bootstrap analysis with 500 replicates. The bar is an indicator of genetic distance based on branch length.
