# Supplementary material for: PAY1 improves plant architecture and enhances grain yield in rice
Source: PubMed Central journal article supplement — Plant J. 2015 Jul 7;83(3):528–36. doi: 10.1111/tpj.12905 (PMC4758413; doi:10.1111/tpj.12905), 2015-07-07
Supplement: TPJ-83-528-s006.pdf [file TPJ-83-528-s006.pdf]

**Figure S6**

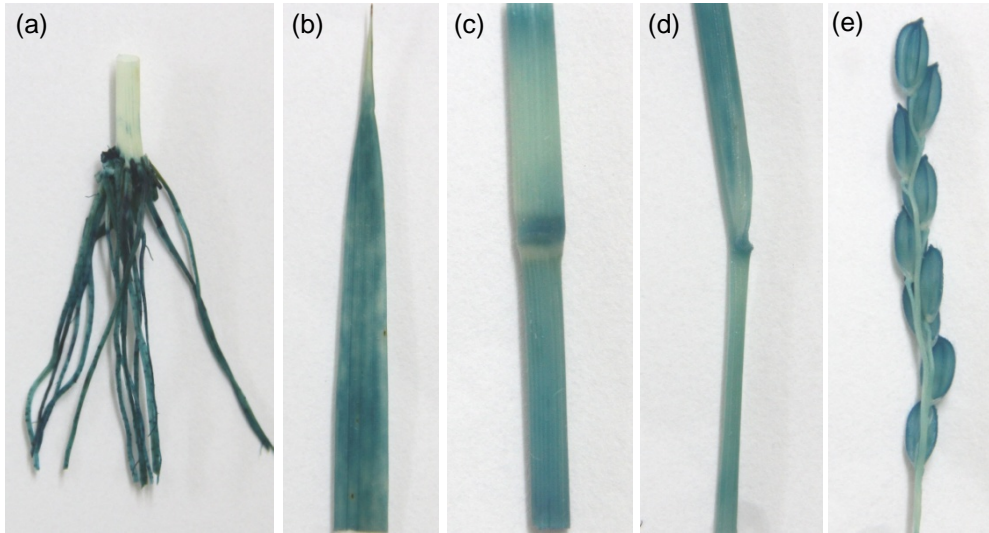

**Supplementary Fig. 6** Expression pattern of *PAYI*. The expression of *PAYI* detected in root (a), leaf (b), leaf sheath (c), leaf-sheath pulvinus (c), culm (c), lamina joint(d), spikelet hull (e) and panicle branch(e) by GUS staining.
