# Supplementary material for: PAY1 improves plant architecture and enhances grain yield in rice
Source: PubMed Central journal article supplement — Plant J. 2015 Jul 7;83(3):528–36. doi: 10.1111/tpj.12905 (PMC4758413; doi:10.1111/tpj.12905), 2015-07-07
Supplement: TPJ-83-528-s007.pdf [file TPJ-83-528-s007.pdf]

**Figure S7**

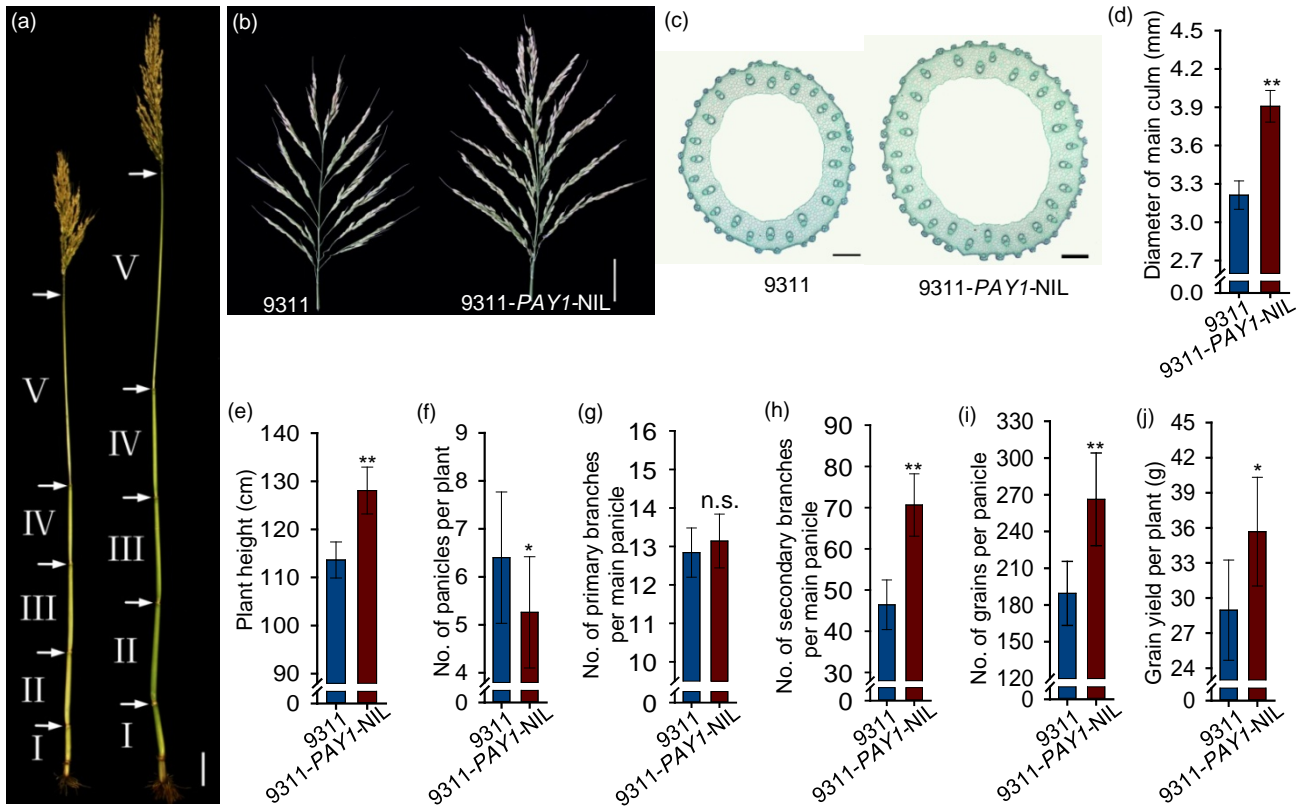

**Supplementary Fig. 7** Phenotype of 9311 and 9311-PAY1-NIL plants. (a) Stem structure of 9311 (left) and 9311-PAY1-NIL (right) plants. (b) Comparison of the main panicle between 9311 and 9311-PAY1-NIL plants. Scale bar, 5 cm. (c) Cross-sections of the fifth internode between 9311 and 9311-PAY1-NIL plants. Scale bars, 200  $\mu$ m. (d) The diameter of the fifth internode between 9311 and 9311-PAY1-NIL plants. Data are means  $\pm$  s.d. ( $n = 20$ ). (e–j) Comparison of plant height (e), number of panicles per plant (f), number of primary branches per main panicle (g), number of secondary branches per main panicles (h), grain number per panicle (i) and grain yield per plant (j) between 9311 and 9311-PAY1-NIL plants. Data are means  $\pm$  s.d. ( $n = 30$ ). \*\*, significant at 1% level; \*, significant at 5% level; n.s., not significant.
