# Supplementary material for: PAY1 improves plant architecture and enhances grain yield in rice
Source: PubMed Central journal article supplement — Plant J. 2015 Jul 7;83(3):528–36. doi: 10.1111/tpj.12905 (PMC4758413; doi:10.1111/tpj.12905), 2015-07-07
Supplement: TPJ-83-528-s008.pdf [file TPJ-83-528-s008.pdf]

**Supplementary Table 1** Primers used for mapping of *PAY1*.

| Name    | Forward primer (5'-3') | Reverse primer (5'-3') |
|---------|------------------------|------------------------|
| RM6990  | ggtgtgatcctttctgatgc   | acgggtgtgatcccagatac   |
| RM531   | gaaacatcccatgttccac    | tcggttttcagactcggtc    |
| RM447   | cccttgctgtctctctc      | acgggcttctctccttctc    |
| RM339   | gtaatcgatgctgtgggaag   | gagtcatgtgatagccgatatg |
| RM223   | gagtgagcttgggctgaaac   | gaaggcaagtcttggcactg   |
| RM3689  | gaagttgaggaacgcgtcac   | gctgctctgttttctctctgc  |
| RM23071 | gtccgccgttgagtgatgacc  | tctcagtcctcctctccttcc  |
| sp2     | cgtcttgaatcgaatacc     | ggagagcaacacagtggagt   |
| sp5     | gaattgaattggtcggaatg   | ggtcattggtgctggtttta   |
| sp6     | ttgatgaaaggagatfff     | gtcaaagaacagcacaccag   |
| sp7     | cgatcatgaaagttgggatct  | atttgcattgttgcactttg   |
| sp9     | agttggctagggaaatcaat   | ttcacgactagaaacccta    |
