# Supplementary material for: PAY1 improves plant architecture and enhances grain yield in rice
Source: PubMed Central journal article supplement — Plant J. 2015 Jul 7;83(3):528–36. doi: 10.1111/tpj.12905 (PMC4758413; doi:10.1111/tpj.12905), 2015-07-07
Supplement: TPJ-83-528-s009.pdf [file TPJ-83-528-s009.pdf]

**Supplementary Table 2** Primer sequences used to generate constructs.

| Construct               | Primer     | Primer                       | Primer         |
|-------------------------|------------|------------------------------|----------------|
| Ubi:: <i>PAY1</i> -OE   | PAY1OE1F   | taggtaccatgcggcctcagatatttg  | <i>Kpn</i> I   |
|                         | PAY1OE1R   | gagagctctcatttctgcaagtctatgt | <i>Sac</i> I   |
|                         | PAY1RNAi1F | cgggatccgtcaatgtacccttcttgat | <i>Bam</i> H I |
| Ubi:: <i>PAY1</i> -RNAi | PAY1RNAi1R | atggtaccgcatgcagggtcatcacagt | <i>Kpn</i> I   |
|                         | PAY1RNAi2F | ttactagtcagtcagagggatcagcact | <i>Spe</i> I   |
|                         | PAY1RNAi2R | gggagctccgagcaaaaaacaaggat   | <i>Sac</i> I   |
| 35S:: <i>PAY1</i> -GFP  | GFP1F      | ttgagctcatgcggcctcagatatttg  | <i>Sac</i> I   |
|                         | GFP1R      | gcggtaccttctgcaagtctatgtcca  | <i>Kpn</i> I   |
| Ubi:: <i>PAY1</i> -GUS  | GUS1F      | gcgaattcagaaagagaaggggagatgc | <i>Ecor</i> I  |
|                         | GUS1R      | ttctgcaggtgggagagagacgaactgg | <i>Pst</i> I   |
