# Supplementary material for: PAY1 improves plant architecture and enhances grain yield in rice
Source: PubMed Central journal article supplement — Plant J. 2015 Jul 7;83(3):528–36. doi: 10.1111/tpj.12905 (PMC4758413; doi:10.1111/tpj.12905), 2015-07-07
Supplement: TPJ-83-528-s011.pdf [file TPJ-83-528-s011.pdf]

**Supplementary Table 4** Information on predicted genes in the fine mapping region of *PAY1*.

---

| Accession number | Annotation                                                                                          |
|------------------|-----------------------------------------------------------------------------------------------------|
| LOC_ Os08g31410  | sulfate transporter                                                                                 |
| LOC_ Os08g31420  | MBTB26 - Bric-a-Brac, Tramtrack, Broad Complex BTB domain with Meprin and TRAF Homology MATH domain |
| LOC_ Os08g31430  | MBTB27 - Bric-a-Brac, Tramtrack, Broad Complex BTB domain with Meprin and TRAF Homology MATH domain |
| LOC_ Os08g31440  | expressed protein                                                                                   |
| LOC_ Os08g31450  | MBTB28 - Bric-a-Brac, Tramtrack, Broad Complex BTB domain with Meprin and TRAF Homology MATH domain |
| LOC_ Os08g31460  | GTPase of unknown function domain containing protein                                                |
| LOC_ Os08g31470  | peptidase, trypsin-like serine and cysteine proteases                                               |

---
